# Supplementary material for: Cytokine therapy reverses NK cell anergy in MHC-deficient tumors
Source: JCI journal article supplement (doi:10.1172/jci74337), 2014-10-19
Supplement: sd1 [file 1]

### **Supplementary Figure 1:**

Representative FACS plots for CD11b/CD27 or MHC class I specific inhibitory receptors stainings are shown for NK cells infiltrating RMA and RMA-S tumors.

**Supplementary Figure 2:** (A-B) Ratios of Tregs or MDSCs to NK cells were calculated in RMA or RMA-S derived tumors. NK cells were gated as viable-CD3<sup>+</sup>CD19<sup>-</sup>Ter119<sup>-</sup>NKp46<sup>+</sup> cells. Tregs were gated as viable-CD3<sup>+</sup>CD19<sup>-</sup>Ter119<sup>-</sup>NKp46<sup>-</sup>CD4<sup>+</sup>FoxP3<sup>+</sup> cells and MDSCs were gated as viable-CD3<sup>+</sup>CD19<sup>-</sup>Ter119<sup>-</sup>NKp46<sup>-</sup>CD11b<sup>+</sup> cells. Several repetitions of each experiment are shown. Statistical analyses were performed with the two-tailed unpaired Student's *t*-test.

Analysis of pooled results in panel A or in panel B revealed no statistically significant differences.

**Supplementary Figure 3:**

Active TGF- $\beta$ 1 protein was detected by ELISA in the tumor bed (A) or in the serum (B) of RMA or RMA-S tumor bearing mice.

## Supplementary Material

**Supplementary Table 1. List of primers used for qPCR analysis**

|                 | <b>Forward</b>                         | <b>Reverse</b>                      |
|-----------------|----------------------------------------|-------------------------------------|
| <b>18S</b>      | 5'-<br>GTCTGTGATGCCCTTAG<br>ATG-3'     | 5'-<br>AGCTTATGACCCGCACTT<br>AC-3'  |
| <b>β-actin</b>  | 5'-<br>AGAGGGAAATCGTGCGT<br>GAC-3'     | 5'-<br>CAATAGTGATGACCTGGC<br>CGT-3' |
| <b>GAPDH</b>    | 5'-<br>TGTGTCCGTCGTGGATC<br>TGA-3'     | 5'-<br>TTGCTGTTGAAGTCGCAG<br>GAG-3' |
| <b>IL-10</b>    | 5'-<br>CACTGCCTTGCTCTTATT<br>TTCACA-3' | 5'-<br>CCCTGGGTGAGAAGCTG<br>AAG-3'  |
| <b>IL-12p40</b> | 5'-<br>GGAAGCACGGCAGCAG                | 5'-<br>AACTTGAGGGAGAAAGTA           |

|                               |                                     |                                    |
|-------------------------------|-------------------------------------|------------------------------------|
|                               | AATA-3'                             | GGAATGG-3'                         |
| <b>IL-18</b>                  | 5'-<br>CAGGCCTGACATCTTCT<br>GCAA-3' | 5'-<br>TCTGACATGGCAGCCATT<br>GT-3' |
| <b>TGF-<math>\beta</math></b> | 5'-<br>CAATTCCTGGCGTTACC<br>T-3'    | 5'-<br>GTATTCCGTCTCCTTGGT<br>T-3'  |

**A****NK cells from:****RMA****RMA-S**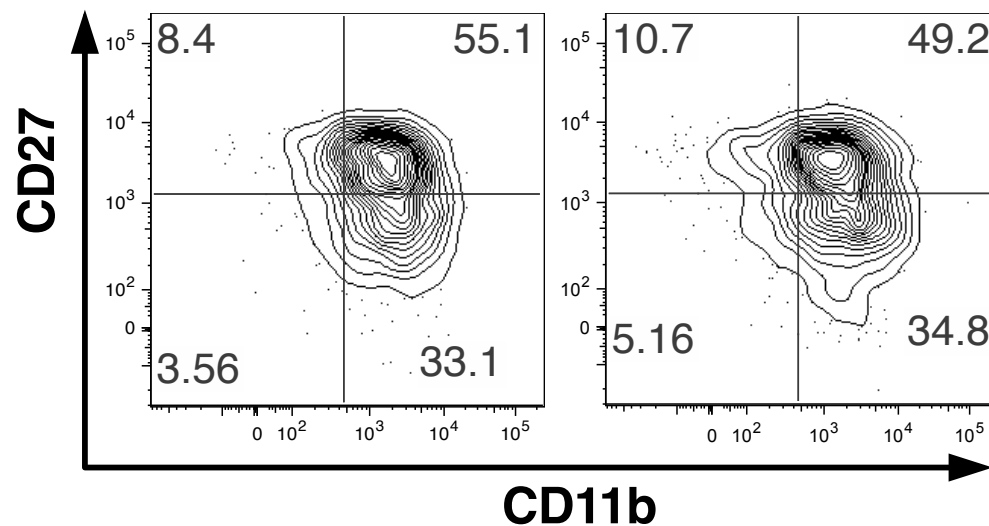**B****NK cells from:****RMA**  
**RMA-S**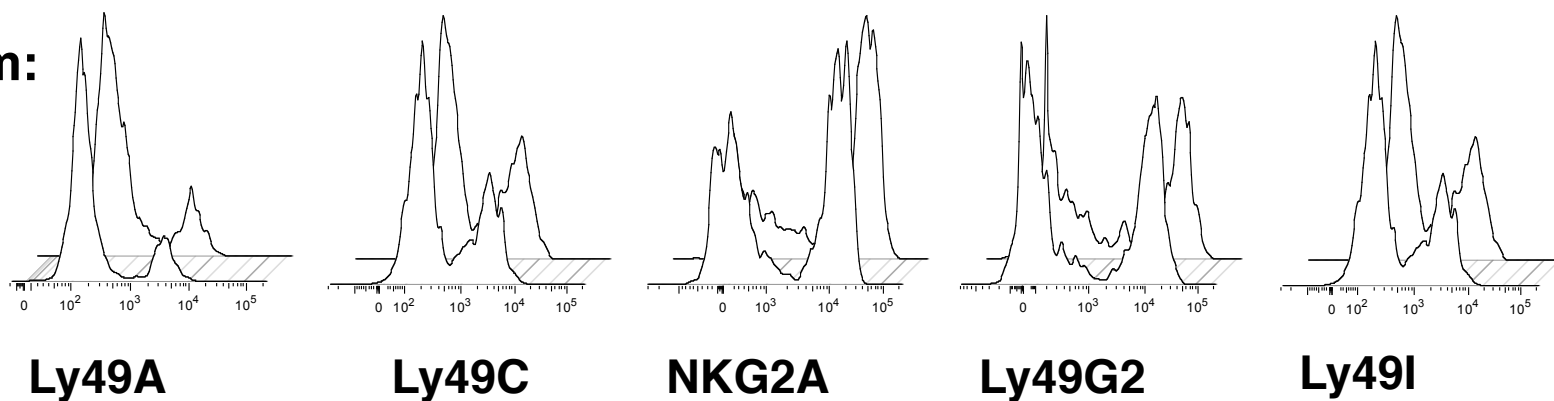**Supplementary Figure 1**

**A**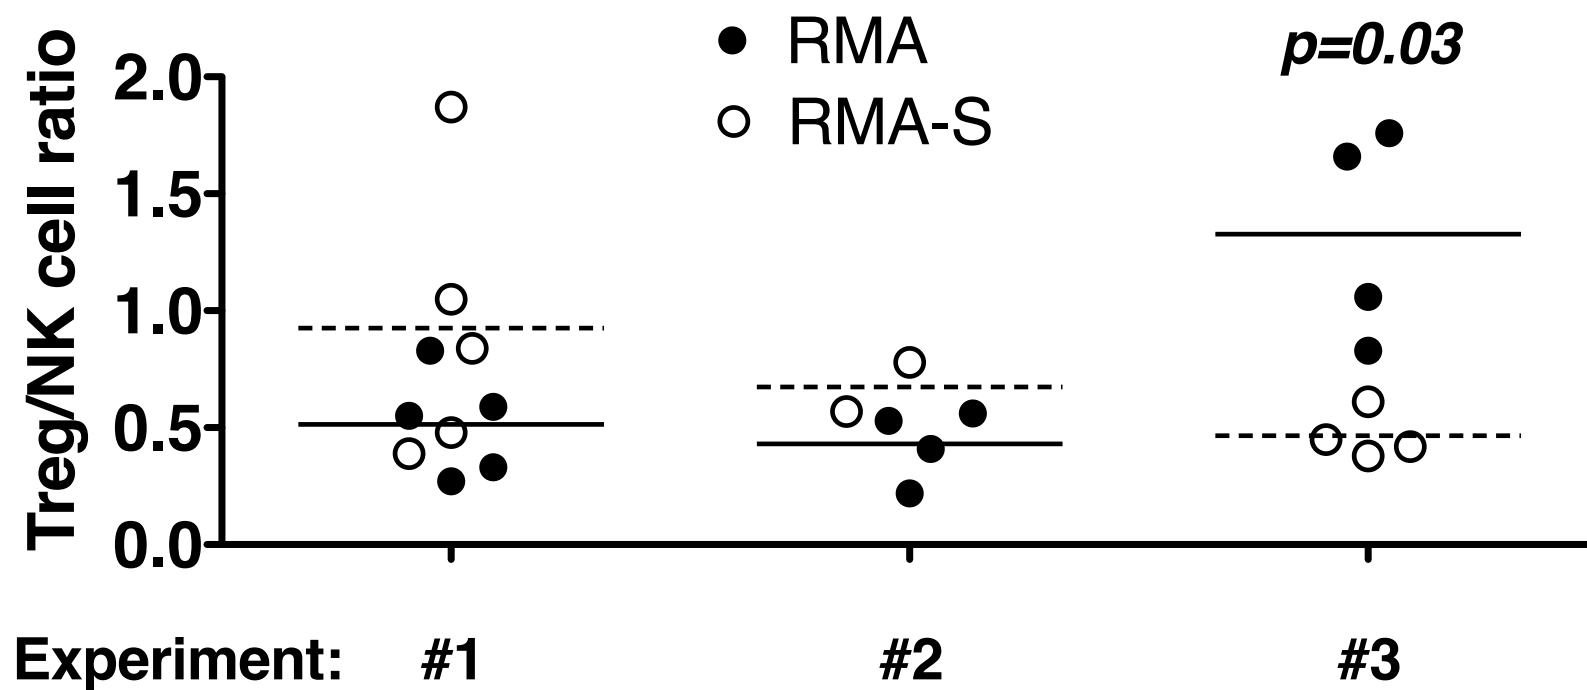**B**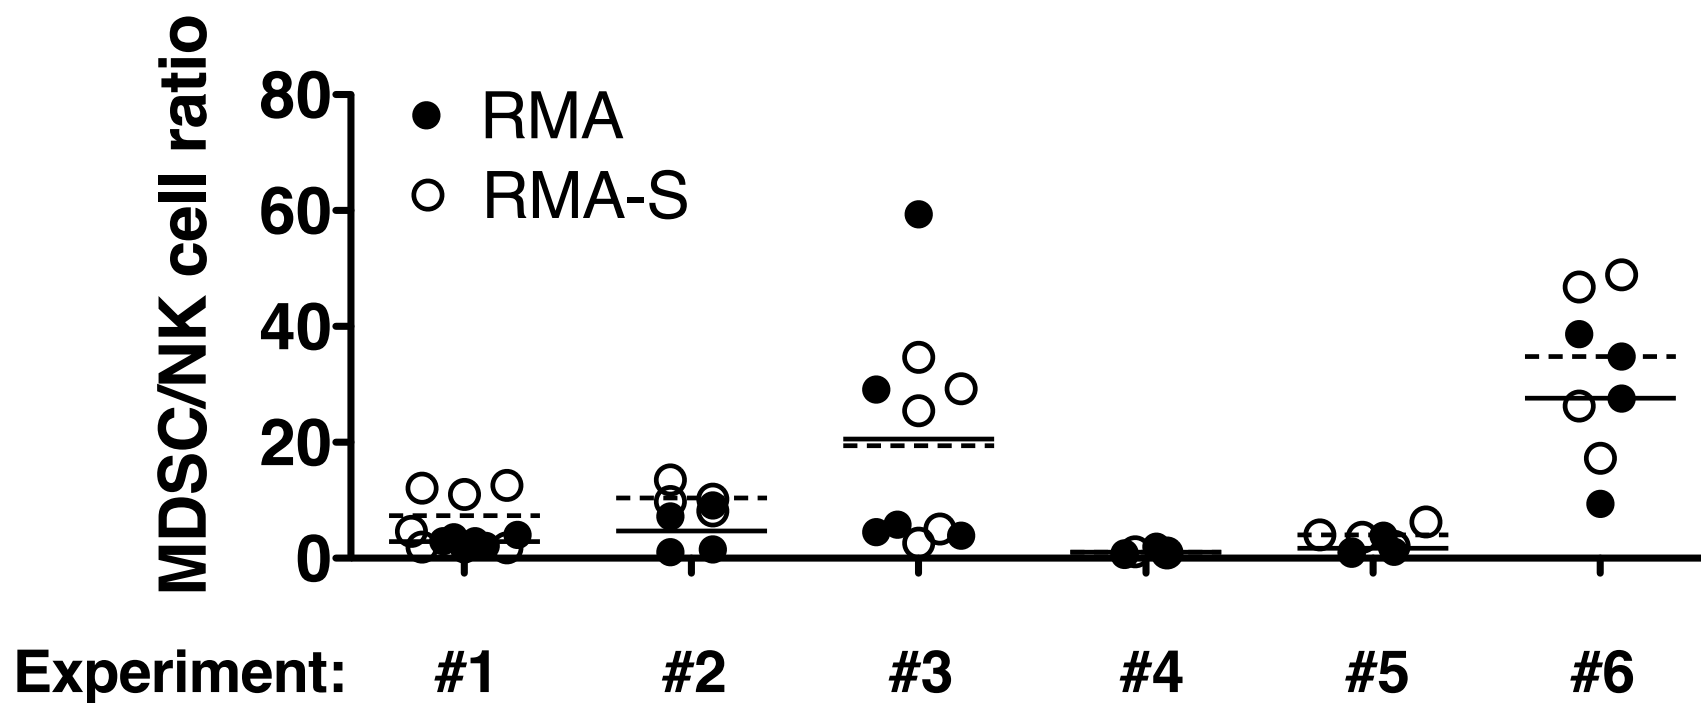

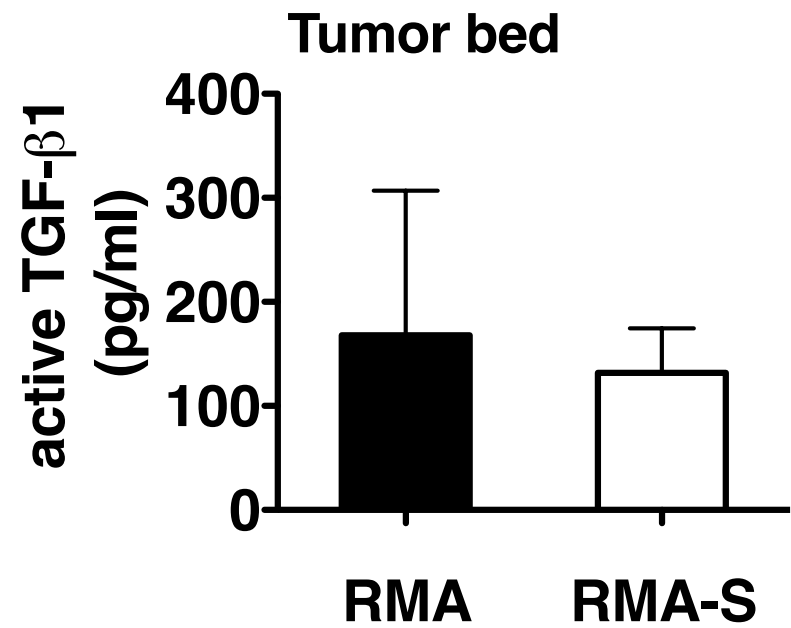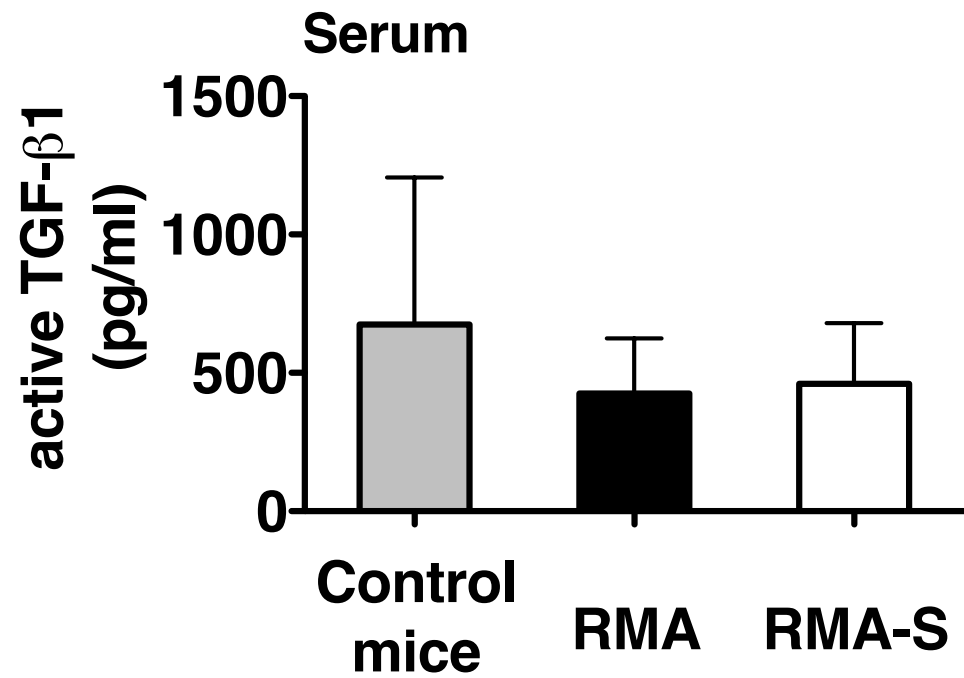

**Supplementary Figure 3**
